# Supplementary material
Source: Research Square preprint supplement (doi:10.21203/rs.3.rs-8933263/v1)
Supplement: Supplementary file 1 [file 5cb21003b4d29c352963402a.docx]

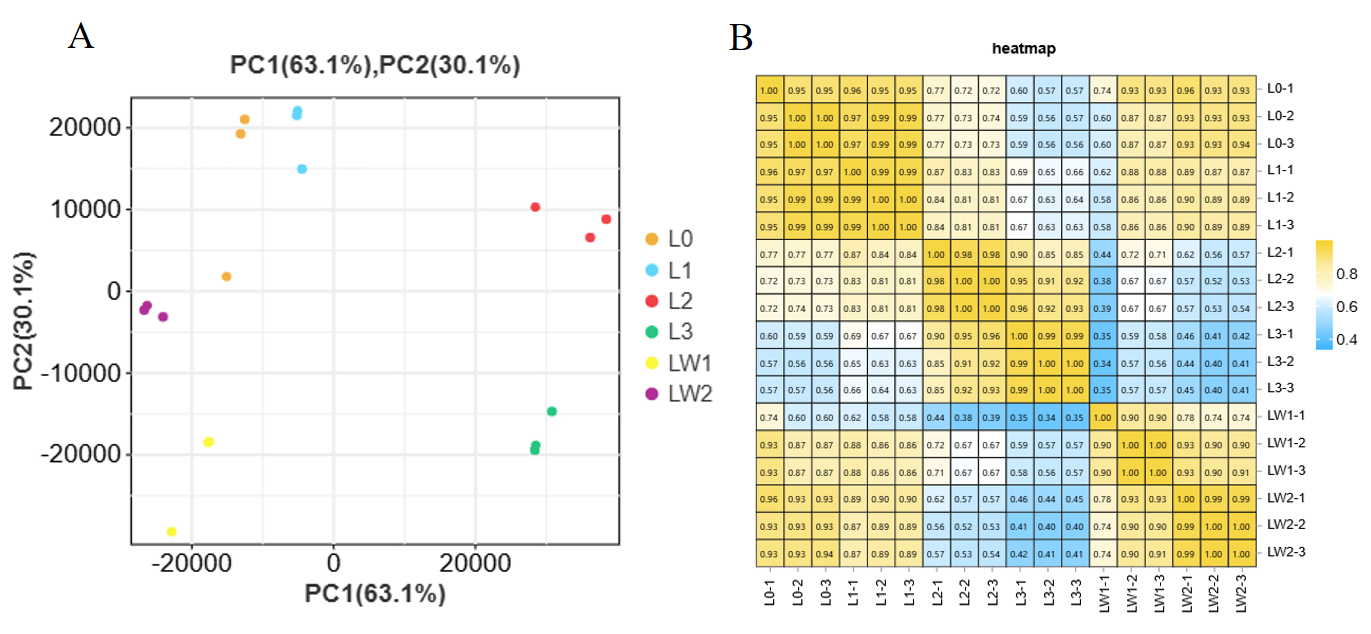


Fig. S1 Principal component analysis （PCA） （A）and correlation heatmap （B） of different *Rosa persica* transcriptome samples


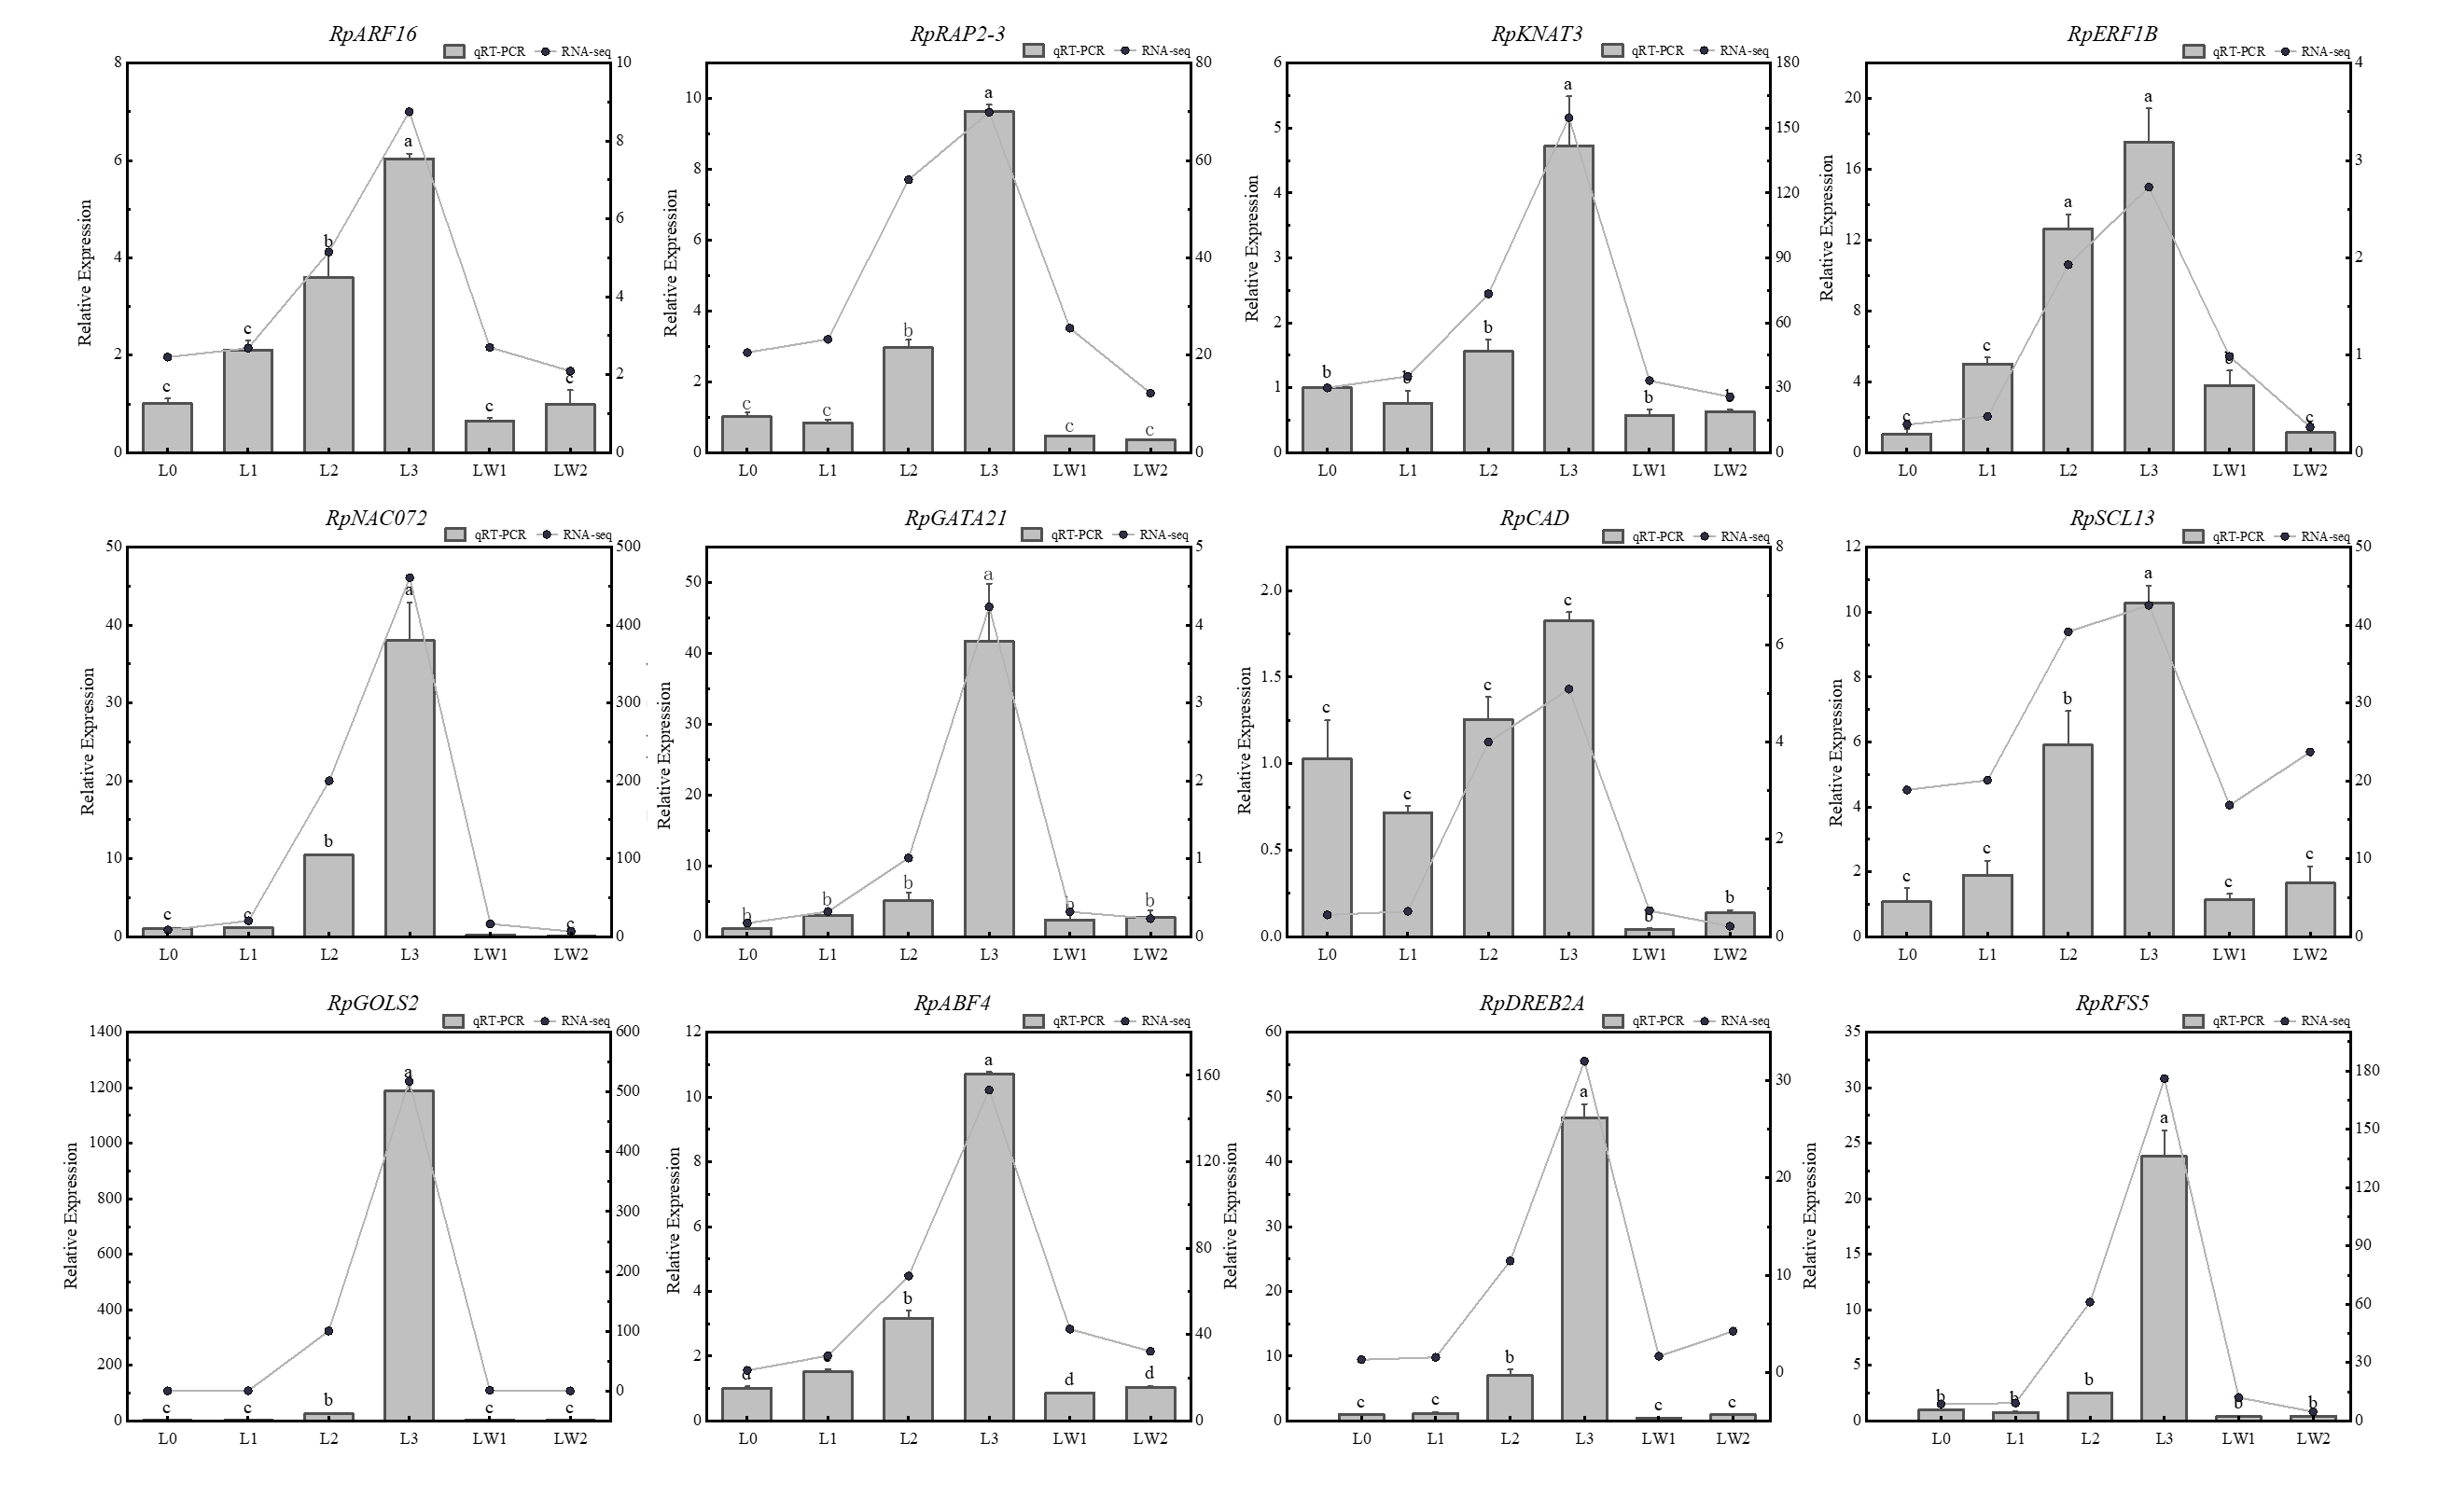


Fig. S2 Validation of qRT-PCR


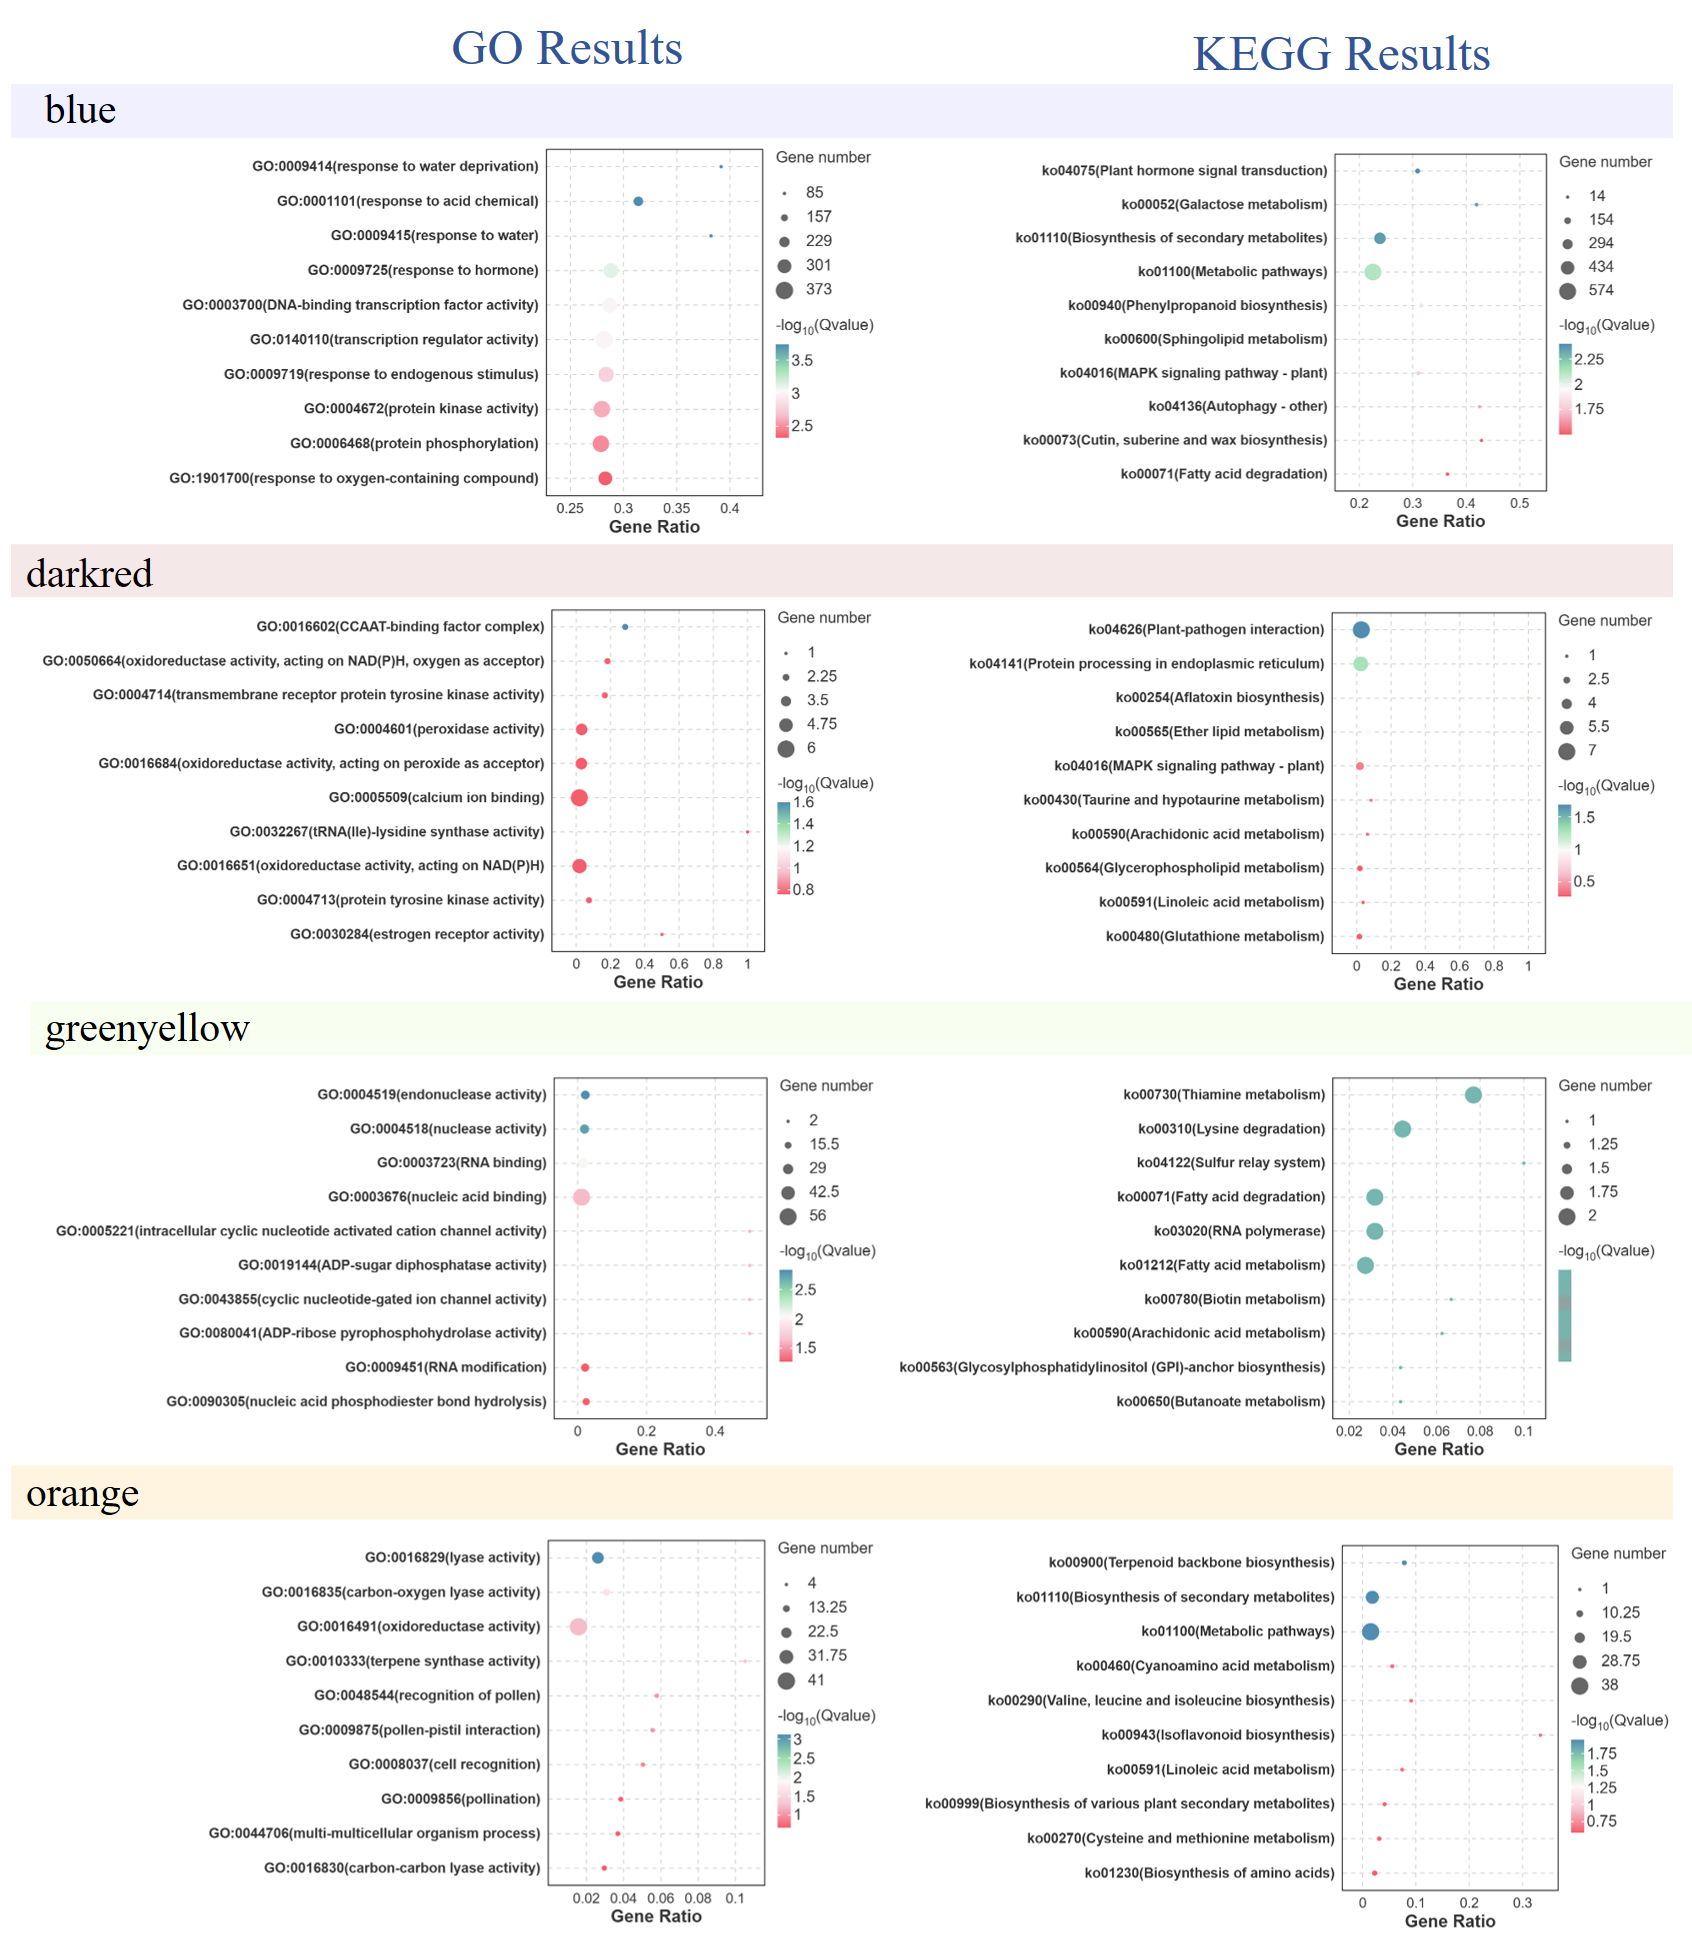


Fig. S3 GO and KEGG significant enrichment of key modules

Fig. S4 Screening of Arabidopsis lines with overexpression
