# Supplementary material
Source: Research Square preprint supplement (doi:10.21203/rs.3.rs-8933263/v1)
Supplement: Supplementary file 2 [file 68a6a51f3dd3f135ef6c5daf.xlsx]

## Sheet: Table S1
Table S1 Primer of qPCR
Gene ID	Primer Sequence
RpGADPH-F	TGAAGGGTGGTGCCAAGAA
RpGADPH-R	AAGGGGAGCAAGACAGTTGG
RpKNAT3-F	GTATGATGCGAGTTTAGATGG
RpKNAT3-R	TTTGTCTTCCTCGGTTGG
RpARF16-F	ACTCCTCGTCGTCACCTT
RpARF16-R	GCCAGAATAACCACCATAC
RpCAD-F	ATGAGATTGTGGGTAAAGTG
RpCAD-R	GAGTAACCGCCGTATGTG
RpNAC072-F	ATACCCAAGCCCAAGGAC
RpNAC072-R	CGAGTGCCCAACCCATAA
RpERF1B-F	TTCTTGCTCAGGCTGGTG
RpERF1B-R	CAAATGCTGCTTGGTCGT
RpGOLS2-F	CCCTCCTTCCTCATTTGC
RpGOLS2-R	TCCCACCATTTCTTCACC
RpABF4-F	CACAGCAGCAGCCAATCT
RpABF4-R	TGTAACACCACCAGCACC
RpDREB2A-F	GCTCGCCTTAACCACCCTAA
RpDREB2A-R	CGTGAACTGAGGACGACCAA
RpRFS5-F	TGGCGGTCCTATTTATGTG
RpRFS5-R	CCTCCTCCTTGGCAGTTA
RpRAP2-3-F	GAGGAATAAGGCAGAGGC
RpRAP2-3-R	TGGAATGACGGATAGTAAGG
RpGATA21-F	GGACACCCTTGACGATGA
RpGATA21-R	AACCCTAACGGCAGACAC
RpSCL13-F	TCACCACAAGGGTCTCAC
RpSCL13-R	TTGTTTCTCGTTCCACCT

## Sheet: Table S2
Table S2 Quality control of transcriptome sequencing data
Sample	Raw Reads （counts）	Clean Reads （counts）	Clean Reads/Raw Reads （%）	Q20 （%）	Q30 （%）	GC Content （%）	Mapped Reads/Clean Reads （%）
L0-1	43503070	43316188	99.57	98.04	94.29	46.18	97.21
L0-2	41299710	41098040	99.51	97.82	93.79	46.31	96.68
L0-3	44632894	44438794	99.57	98.07	94.37	46.3	96.89
L1-1	48050600	47796760	99.47	97.77	93.69	46.22	97.15
L1-2	41621626	41406312	99.48	97.67	93.41	46.15	95.96
L1-3	48498742	48265064	99.52	98.09	94.38	46.28	96.17
L2-1	39094318	38893092	99.49	97.69	93.47	45.95	94.45
L2-2	40978550	40780766	99.52	97.81	93.78	45.68	91.02
L2-3	38099908	37916874	99.52	97.89	93.95	45.66	91.09
L3-1	39262582	39087366	99.55	97.93	93.96	45.41	93.47
L3-2	42347038	42153698	99.54	97.89	93.93	45.63	94.18
L3-3	37878000	37710064	99.56	98.02	94.21	45.64	94.3
LW1-1	38776192	38594784	99.53	97.86	93.85	46.18	97.23
LW1-2	43815618	43625990	99.57	97.94	94.03	46.24	97.24
LW1-3	41816536	41632154	99.56	97.93	94.03	46.13	97.19
LW2-1	40458198	40282252	99.57	97.82	93.71	46.34	97.36
LW2-2	44494916	44309198	99.58	97.95	94.04	46.29	97.32
LW2-3	40751194	40568348	99.55	97.73	93.59	46.39	97.22

## Sheet: Table S3
Table S3 Cis-acting elements in the promoter of RpERF113-like
Site name	Core sequence	Number of sites	Function
ABRE	ACGTG	3	abscisic acid responsiveness
ARE	AAACCA	4	anaerobic induction
TC-rich repeats	GTTTTCTTAC	2	defense and stress responsiveness
G-Box	CACGTT	2	light responsiveness
ACE	GACACGTATG	1	light responsiveness
I-box	GTATAAGGCC	1	light responsiveness
TCCC-motif	TCTCCCT	1	light responsiveness
Box 4	ATTAAT	2	light responsiveness
GATA-motif	AAGGATAAGG	1	light responsiveness
GT1-motif	GGTTAA	1	light responsiveness
CGTCA-motif	CGTCA	2	MeJA-responsiveness
TGACG-motif	TGACG	2	MeJA-responsiveness
CAT-box	GCCACT	1	meristem expression
MBS	CAACTG	2	MYB binding site involved in drought-inducibility
MBSI	aaaAaaC(G/C)GTTA	1	MYB binding site involved in flavonoid biosynthetic
TCA-element	CCATCTTTTT	2	salicylic acid responsiveness
